# Supplementary material for: Integrated electrocoagulation and membrane filtration for PAH removal from realistic industrial wastewater: effectiveness and mechanisms
Source: Royal Society of Chemistry journal article supplement (doi:10.1039/c7ra09372a), 2017-01-01
Supplement: c7ra09372a1.pdf [file c7ra09372a1.pdf]

**Table.SM-1.** Characteristics of the paper-making wastewater prefiltered using 1.2  $\mu\text{m}$  glass-fiber filters.

| Parameters       | Unit                 | Value |
|------------------|----------------------|-------|
| Turbidity        | ntu                  | 0.85  |
| Color            | -                    | 208   |
| pH               | -                    | 7.85  |
| COD              | $\text{mg L}^{-1}$   | 198.2 |
| BOD <sub>5</sub> | $\text{mg L}^{-1}$   | 13    |
| TOC              | $\text{mg L}^{-1}$   | 59.1  |
| Conductivity     | $\mu\text{S m}^{-1}$ | 2110  |

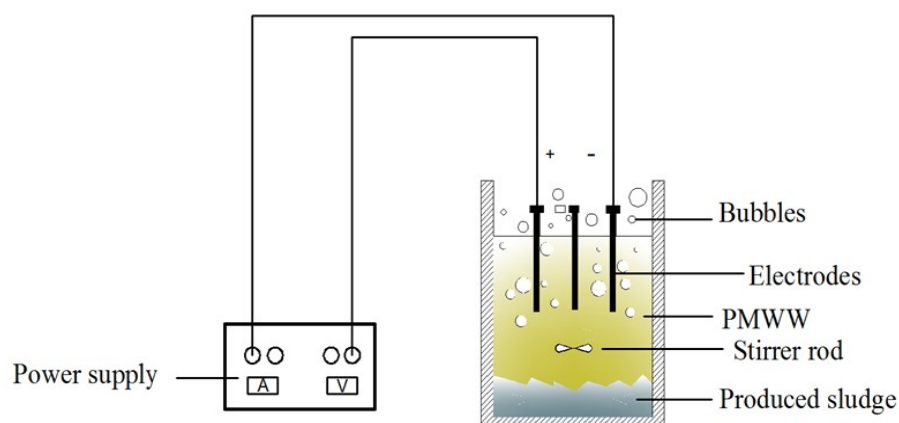

**Fig.SM-1.** Scheme of experimental set-up for electrocoagulation treatment.

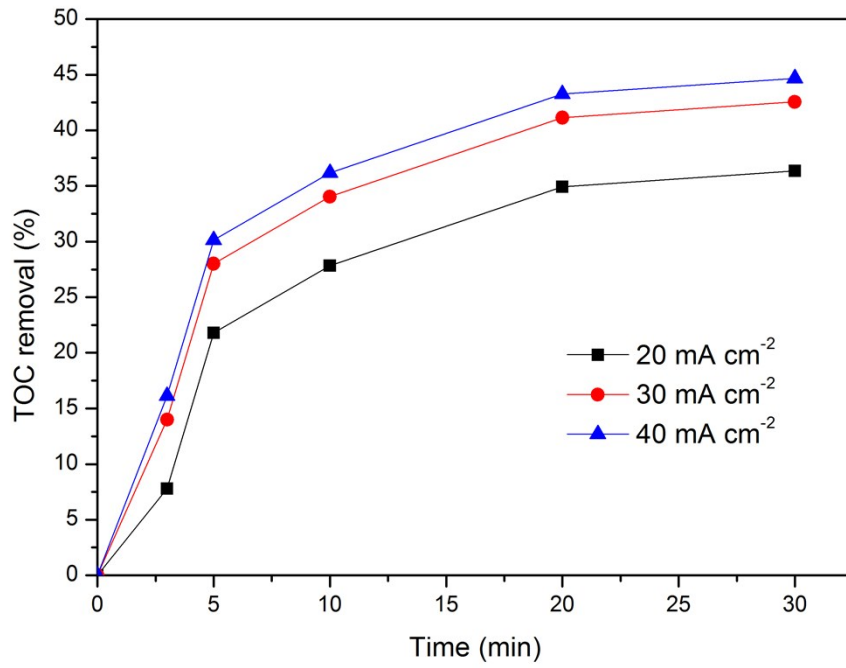

**Fig.SM-2.** The effect of EC-treatment time on TOC removal from PMWW.  
Treatment conditions: initial pH = 7.85, temperature = 25 °C;

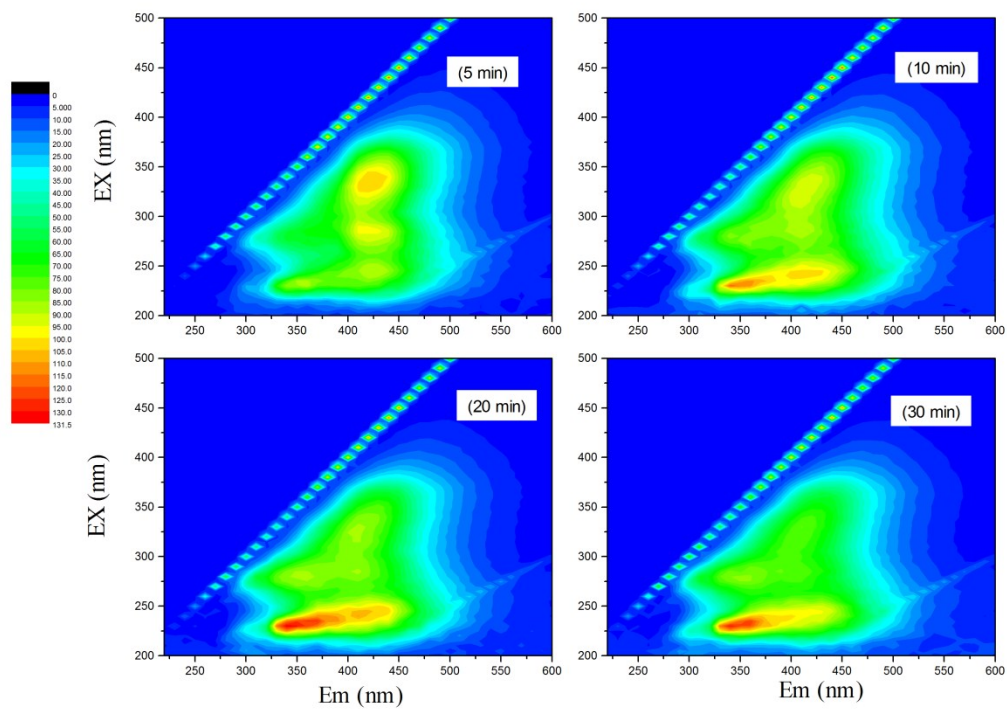

**Fig.SM-3.** Fluorescence excitation-emission matrix spectra of the wastewater treated by EC treatment. EC conditions: initial pH = 7.85, current density = 30 mA cm<sup>-2</sup>, treatment time = 30 min, temperature = 25 °C.
